# Supplementary material for: The Tumor-Suppressive miR-497-195 Cluster Targets Multiple Cell-Cycle Regulators in Hepatocellular Carcinoma
Source: PLoS One. 2013 Mar 27;8(3):e60155. doi: 10.1371/journal.pone.0060155 (PMC3609788; doi:10.1371/journal.pone.0060155)
Supplement: Dataset S2 — List of downregulated miRNAs in 6 HCC cell lines compared with C20 and C40 determined by miRNA expression array. (XLSX) [file pone.0060155.s013.xlsx]

## Sheet: Sheet1
Dataset S2 List of downregulated miRNAs in 6 HCC cell lines compared with C20 and C40 determined by miRNA expression array
		expression ratio vs C20							expression ratio vs C40
	miRNA	Hep 3B	Hep G2	HLE	Huh7	JHH-4	sK-Hep-1		Hep 3B	Hep G2	HLE	Huh7	JHH-4	sK-Hep-1
1	hsa-miR-192*	0.00115427	0.00115427	0.00115427	0.00115427	0.00115427	0.00138512		0.00115427	0.00145437	0.00115427	0.00145437	0.00145437	0.00145437
2	hsa-miR-451	0.000393304	0.0062205	0.000393304	0.000393304	0.000393304	0.0016374		0.000393304	0.000779929	0.000393304	0.0123354	0.000779929	0.000779929
3	hsa-miR-29c*	0.0029547	0.0029547	0.0029547	0.0029547	0.0029547	0.00354564		0.0029547	0.00347763	0.0029547	0.00347763	0.00347763	0.00347763
4	hsa-miR-122*	0.0012219	0.0290364	0.0012219	0.0012219	0.0012219	0.00702917		0.0012219	0.00143863	0.0012219	0.0341868	0.00143863	0.00143863
5	hsa-miR-199a-3p	0.00680774	0.00680774	0.00680774	0.00680774	0.00680774	0.00816929		0.00680774	0.00525547	0.00680774	0.00525547	0.00525547	0.00525547
6	hsa-miR-195	0.00538761	0.00538761	0.00538761	0.00538761	0.00538761	0.00909493		0.00538761	0.0134346	0.00538761	0.00390473	0.00390473	0.00390473
7	hsa-miR-122	0.00011437	0.0398825	0.00011437	0.00011437	0.00011437	0.00809087		0.00011437	0.000155386	0.00011437	0.0541851	0.000155386	0.000155386
8	hsa-miR-223	0.00734253	0.00734253	0.00734253	0.00734253	0.00734253	0.00881104		0.00734253	0.015624	0.00734253	0.015624	0.015624	0.015624
9	hsa-miR-497	0.0133413	0.0133413	0.0133413	0.0133413	0.0133413	0.0160096		0.0133413	0.0116079	0.0133413	0.0116079	0.0116079	0.0116079
10	hsa-miR-144	0.0124316	0.0124316	0.0124316	0.0124316	0.0124316	0.0149179		0.0124316	0.0240213	0.0124316	0.0240213	0.0240213	0.0240213
11	hsa-miR-199a-5p	0.0189174	0.0189174	0.0189174	0.0189174	0.0189174	0.0227009		0.0189174	0.0168506	0.0189174	0.0168506	0.0168506	0.0168506
12	hsa-miR-145	0.0241938	0.0241938	0.0241938	0.0241938	0.0241938	0.0290326		0.0241938	0.0171822	0.0241938	0.0171822	0.0171822	0.0171822
13	hsa-miR-148a	0.0318718	0.0901988	0.00171152	0.00171152	0.00171152	0.0278471		0.0318718	0.0137259	0.00171152	0.10291	0.00195271	0.00195271
14	hsa-miR-126	0.0727615	0.0735592	0.00259097	0.00259097	0.00259097	0.0313369		0.0727615	0.00239683	0.00259097	0.0680475	0.00239683	0.00239683
15	hsa-miR-572	0.0273715	0.0273715	0.0273715	0.0273715	0.0273715	0.0328458		0.0273715	0.0530614	0.0273715	0.0530614	0.0530614	0.0530614
16	hsa-miR-150	0.00480182	0.00480182	0.00480182	0.00480182	0.00480182	0.00576219		0.00480182	0.118813	0.00480182	0.118813	0.118813	0.118813
17	hsa-miR-638	0.0239856	0.00418517	0.0259271	0.0183929	0.107967	0.0393686		0.0239856	0.0297993	0.0259271	0.00761151	0.0334509	0.196359
18	hsa-miR-136	0.0576341	0.0576341	0.0576341	0.0576341	0.0576341	0.0691609		0.0576341	0.0108183	0.0576341	0.0108183	0.0108183	0.0108183
19	hsa-miR-214	0.0635429	0.0635429	0.0635429	0.0635429	0.0635429	0.0762515		0.0635429	0.00125344	0.0635429	0.00125344	0.00125344	0.00125344
20	hsa-miR-574-3p	0.0363154	0.0363154	0.0363154	0.0363154	0.0363154	0.0435785		0.0363154	0.0669983	0.0363154	0.0669983	0.0669983	0.0669983
21	hsa-miR-378	0.0637778	0.0637778	0.0637778	0.0637778	0.0637778	0.0765333		0.0637778	0.019935	0.0637778	0.019935	0.019935	0.019935
22	hsa-miR-139-5p	0.0464979	0.0464979	0.0464979	0.0464979	0.0464979	0.0557975		0.0464979	0.0691735	0.0464979	0.0691735	0.0691735	0.0691735
23	hsa-miR-1225-5p	0.00481457	0.00481457	0.0454409	0.00481457	0.15994	0.0508013		0.00481457	0.0590976	0.0454409	0.00832405	0.00832405	0.276526
24	hsa-miR-143	0.0751764	0.0751764	0.0751764	0.0751764	0.0751764	0.0902116		0.0751764	0.0168083	0.0751764	0.0168083	0.0168083	0.0168083
25	hsa-miR-1202	0.0442136	0.00357172	0.115498	0.0264073	0.0594805	0.0543502		0.0442136	0.059717	0.115498	0.00944613	0.0698395	0.157308
26	hsa-miR-146b-5p	0.0363125	0.0363125	0.0363125	0.0363125	0.0363125	0.0666271		0.0363125	0.186059	0.0363125	0.0445744	0.0445744	0.0445744
27	hsa-miR-939	0.0480892	0.0480892	0.0480892	0.0480892	0.0480892	0.057707		0.0480892	0.088739	0.0480892	0.088739	0.088739	0.088739
28	hsa-miR-29c	0.0312727	0.028452	0.0260891	0.0258297	0.161849	0.078796		0.0312727	0.125283	0.0260891	0.0295845	0.0268578	0.168291
29	hsa-miR-575	0.046081	0.046081	0.046081	0.046081	0.046081	0.0552972		0.046081	0.115292	0.046081	0.115292	0.115292	0.115292
30	hsa-miR-101	0.0472225	0.00492116	0.33789	0.00492116	0.00492116	0.0974549		0.0472225	0.0885575	0.33789	0.00498639	0.00498639	0.00498639
31	hsa-miR-192	0.16806	0.16753	0.000802451	0.000802451	0.000802451	0.0949141		0.16806	0.153452	0.000802451	0.188234	0.000901622	0.000901622
32	hsa-let-7c	0.202519	0.0224113	0.10855	0.0575198	0.127787	0.104486		0.202519	0.00426341	0.10855	0.0262355	0.067335	0.149592
33	hsa-miR-557	0.117855	0.117855	0.117855	0.117855	0.117855	0.141426		0.117855	0.0561924	0.117855	0.0561924	0.0561924	0.0561924
34	hsa-miR-99a	0.194067	0.151073	0.167192	0.080744	0.00509133	0.120652		0.194067	0.00604712	0.167192	0.179434	0.0959021	0.00604712
35	hsa-miR-215	0.153603	0.347137	0.00272831	0.00272831	0.00272831	0.127025		0.153603	0.152217	0.00272831	0.4187	0.00329076	0.00329076
36	hsa-miR-26b	0.206768	0.062567	0.060443	0.153316	0.0940297	0.150403		0.206768	0.177427	0.060443	0.0634743	0.155539	0.0953933
37	hsa-miR-1228	0.0291474	0.0291474	0.199565	0.0291474	0.396552	0.174019		0.0291474	0.208089	0.199565	0.0325154	0.0325154	0.442374
38	hsa-miR-23b	0.369177	0.154958	0.119336	0.158153	0.0176074	0.197346		0.369177	0.194098	0.119336	0.179563	0.183265	0.0204032
39	hsa-miR-376a	0.193772	0.193772	0.193772	0.193772	0.193772	0.232526		0.193772	0.213773	0.193772	0.213773	0.213773	0.213773
40	hsa-miR-1249	0.0911648	0.206876	0.15241	0.180447	0.46041	0.267839		0.0911648	0.25371	0.15241	0.211735	0.184686	0.471225
41	hsa-miR-151-5p	0.277661	0.253509	0.25268	0.118455	0.301391	0.274029		0.277661	0.17188	0.25268	0.261783	0.122321	0.311227
42	hsa-miR-30b	0.281239	0.315252	0.0740508	0.215842	0.136186	0.240924		0.281239	0.278518	0.0740508	0.482298	0.330213	0.208348
43	hsa-miR-22	0.335592	0.375928	0.202117	0.0477761	0.374844	0.290109		0.335592	0.125278	0.202117	0.412087	0.0523715	0.410899
44	hsa-miR-200b	0.465347	0.407887	0.00216442	0.171393	0.425564	0.330566		0.465347	0.17308	0.00216442	0.39117	0.164369	0.408123
45	hsa-miR-15a	0.240539	0.379422	0.315466	0.0635407	0.265021	0.332498		0.240539	0.458801	0.315466	0.436836	0.0731557	0.305124
															1
															1
															1
															1
															1
															1
															1
															1
															1
															1
															1
															1
															1
