# Supplementary material for: The Tumor-Suppressive miR-497-195 Cluster Targets Multiple Cell-Cycle Regulators in Hepatocellular Carcinoma
Source: PubMed Central journal article supplement (PMC3609788; doi:10.1371/journal.pone.0060155), 2013-03-27

# Supplementary Fig. S1

**A**

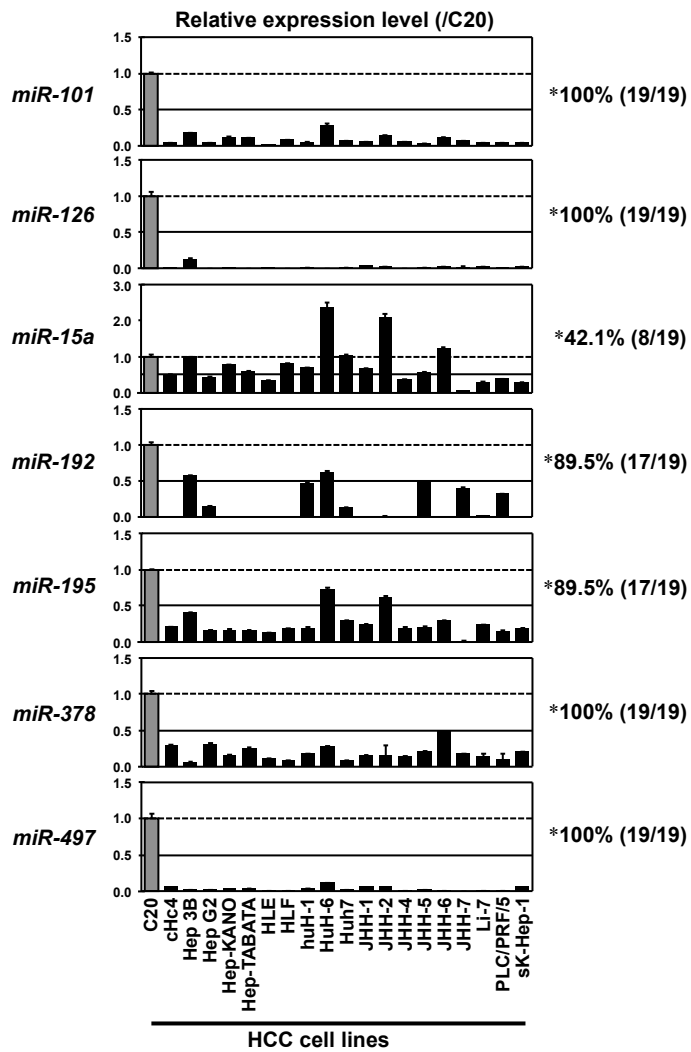

# Supplementary Fig. S1 CONTINUED

**B**

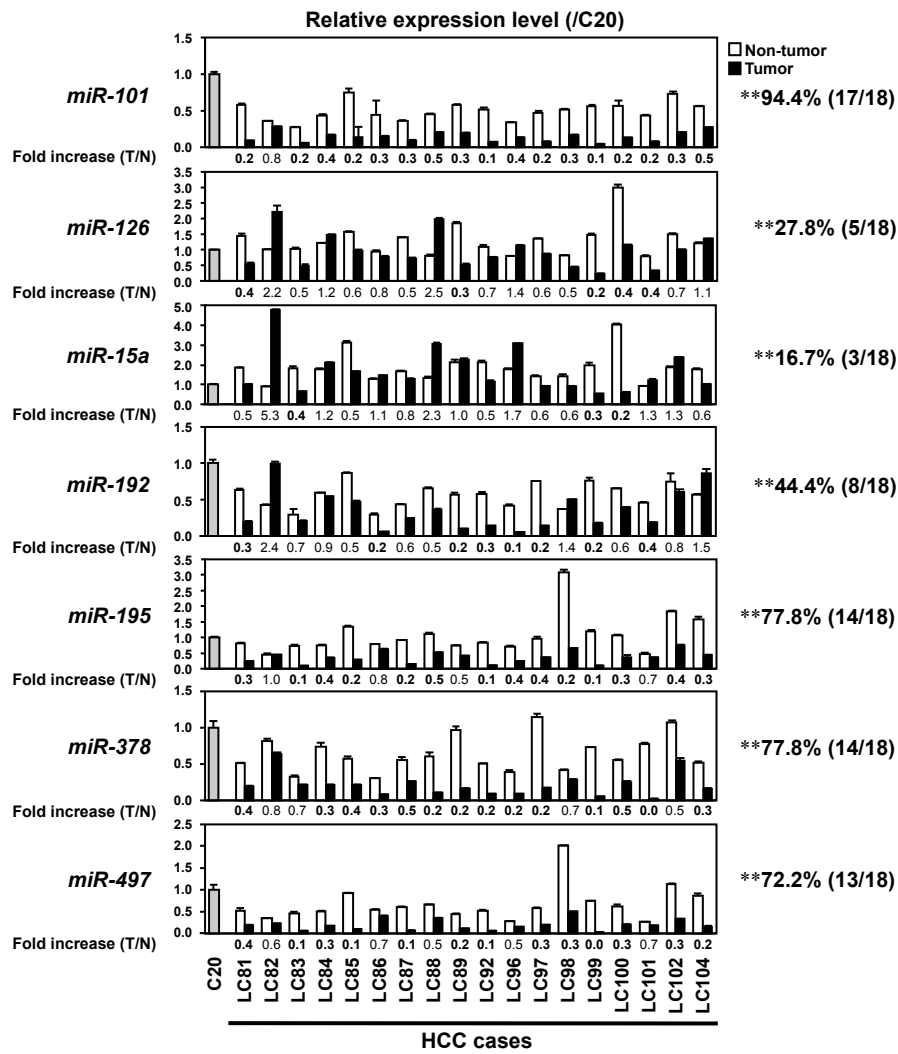

Supplement: pone.0060155.s001.pdf [file pone.0060155.s001.pdf]
