# Supplementary material for: The Tumor-Suppressive miR-497-195 Cluster Targets Multiple Cell-Cycle Regulators in Hepatocellular Carcinoma
Source: PubMed Central journal article supplement (PMC3609788; doi:10.1371/journal.pone.0060155), 2013-03-27
Supplement: pone.0060155.s007.pdf [file pone.0060155.s007.pdf]

**Supplementary Table S2 Top 20 genes ranked by the fold enrichment score in Ago2-IP-seq with miRNA target predictions**

| Rank                                                                                   | Gene Symbol | fold enrichment score<br>vs non-treated cells | Criteria of target site prediction |              |           |            |
|----------------------------------------------------------------------------------------|-------------|-----------------------------------------------|------------------------------------|--------------|-----------|------------|
|                                                                                        |             |                                               | 3'UTR sequence <sup>a</sup>        | microRNA.org | Microcosm | TargetScan |
| <b>Genes enriched in Ago2-IP fraction of <i>miR-195</i>-overexpressed Hep G2 cells</b> |             |                                               |                                    |              |           |            |
| 1                                                                                      | ARL2        | 47.837                                        | matched                            | +            | +         |            |
| 2                                                                                      | PTCH2       | 40.300                                        | matched                            |              |           |            |
| 3                                                                                      | CA2         | 32.255                                        | matched                            | +            | +         |            |
| 4                                                                                      | TNFSF9      | 16.863                                        | matched                            |              |           |            |
| 5                                                                                      | TUBA1A      | 15.890                                        | matched                            | +            | +         | +          |
| 6                                                                                      | MCART6      | 15.081                                        | matched                            | +            | +         |            |
| 7                                                                                      | XKR8        | 14.709                                        | matched                            |              |           |            |
| 8                                                                                      | ERN2        | 14.665                                        |                                    | +            | +         |            |
| 9                                                                                      | BIK         | 14.611                                        | matched                            |              |           |            |
| 10                                                                                     | FSTL1       | 13.928                                        | matched                            | +            | +         |            |
| 11                                                                                     | RPS14       | 12.932                                        | matched                            |              |           |            |
| 12                                                                                     | RABAC1      | 12.747                                        | matched                            |              |           | +          |
| 13                                                                                     | CCNE1       | 12.562                                        | matched                            | +            | +         |            |
| 14                                                                                     | CBLC        | 12.318                                        | matched                            |              |           |            |
| 15                                                                                     | CXorf40A    | 12.165                                        | matched                            | +            | +         |            |
| 16                                                                                     | SNCG        | 12.097                                        | matched                            | +            | +         | +          |
| 17                                                                                     | POF1B       | 11.723                                        | matched                            | +            | +         |            |
| 18                                                                                     | IHH         | 11.494                                        | matched                            | +            | +         |            |
| 19                                                                                     | OSCAR       | 10.997                                        |                                    | +            | +         |            |
| 20                                                                                     | PPP1R11     | 10.936                                        |                                    | +            | +         |            |
| <b>Genes enriched in Ago2-IP fraction of <i>miR-497</i>-overexpressed Hep G2 cells</b> |             |                                               |                                    |              |           |            |
| 1                                                                                      | NOS2        | 23.734                                        | matched                            | +            | +         |            |
| 2                                                                                      | POF1B       | 15.818                                        | matched                            | +            | +         |            |
| 3                                                                                      | SCN2A       | 15.813                                        | matched                            | +            | +         |            |
| 4                                                                                      | HNRNPH2     | 14.957                                        |                                    | +            | +         |            |
| 5                                                                                      | RGPD4       | 14.501                                        | matched                            | +            | +         |            |
| 6                                                                                      | RARB        | 14.282                                        | matched                            | +            | +         |            |
| 7                                                                                      | RFX4        | 13.842                                        |                                    | +            | +         |            |
| 8                                                                                      | PTCH2       | 11.754                                        | matched                            |              |           |            |
| 9                                                                                      | FSTL1       | 9.887                                         | matched                            | +            | +         |            |
| 10                                                                                     | TUBA1A      | 7.855                                         | matched                            | +            | +         | +          |
| 11                                                                                     | SPDYE6      | 7.414                                         |                                    | +            | +         |            |
| 12                                                                                     | C1orf114    | 6.594                                         |                                    | +            | +         |            |
| 13                                                                                     | ZNF568      | 6.329                                         |                                    | +            | +         |            |
| 14                                                                                     | FHAD1       | 5.936                                         |                                    |              |           |            |
| 15                                                                                     | AQP4        | 5.934                                         | matched                            |              |           |            |
| 16                                                                                     | DLX5        | 5.933                                         |                                    |              |           |            |
| 17                                                                                     | PPFIA4      | 5.931                                         |                                    | +            | +         |            |
| 18                                                                                     | TTC23L      | 5.538                                         |                                    | +            | +         |            |
| 19                                                                                     | MAMDC2      | 5.274                                         |                                    | +            | +         |            |
| 20                                                                                     | TMEM200A    | 5.086                                         |                                    | +            | +         |            |

<sup>a</sup>Genes harboring the *miR-195* and *miR-497* targeting sequence (5'-ACGACGA-3') in the 3'UTR of mRNA are shown as "matched"
