# Supplementary material for: The Tumor-Suppressive miR-497-195 Cluster Targets Multiple Cell-Cycle Regulators in Hepatocellular Carcinoma
Source: PubMed Central journal article supplement (PMC3609788; doi:10.1371/journal.pone.0060155), 2013-03-27
Supplement: pone.0060155.s008.pdf [file pone.0060155.s008.pdf]

Supplementary Table S3 Significance of identified target genes for *miR-195* and *miR-497* in Ago2-IP-seq, expression array experiments, and statistical analysis

| GeneName      | Ago2-IP-seq in Hep G2 |      |                  |      | Expression array (log2 ratio vs control transfectants) |                |                |                | Correlation of expression in HCC primary cases* |             |                          |             |
|---------------|-----------------------|------|------------------|------|--------------------------------------------------------|----------------|----------------|----------------|-------------------------------------------------|-------------|--------------------------|-------------|
|               | <i>miR-195</i>        |      | <i>miR-497</i>   |      | Hep G2                                                 |                | sK-Hep-1       |                | <i>miR-195</i>                                  |             | <i>miR-497</i>           |             |
|               | fold enrichment       | rank | fold enrichment  | rank | <i>miR-195</i>                                         | <i>miR-497</i> | <i>miR-195</i> | <i>miR-497</i> | correlation coefficient*                        | p-value     | correlation coefficient* | p-value     |
| <i>CDK6</i>   | 2.4518615             | 553  | <b>1.5193529</b> | 210  | -1.22087                                               | -1.32380       | -1.40482       | -1.41466       | <b>-0.2570845</b>                               | <b>0.02</b> | <b>-0.3091761</b>        | <b>0.00</b> |
| <i>CCND1</i>  | <b>4.0197213</b>      | 184  | <b>1.0197937</b> | 915  | -0.05767                                               | -0.77935       | -1.56689       | -1.33998       | 0.2661775                                       | 0.01        | 0.2611633                | 0.01        |
| <i>CCND3</i>  | <b>6.6434619</b>      | 50   | 0.8435109        | 1451 | -2.97051                                               | -2.52965       | -3.06233       | -1.76106       | 0.0859502                                       | 0.42        | 0.0988667                | 0.36        |
| <i>CCNE1</i>  | <b>12.5615966</b>     | 14   | <b>2.3372704</b> | 78   | -1.71522                                               | -1.41478       | -1.94184       | -1.06548       | <b>-0.3686009</b>                               | <b>0.00</b> | <b>-0.2994528</b>        | <b>0.00</b> |
| <i>CDC25A</i> | <b>5.1771055</b>      | 97   | <b>0.9662803</b> | 1075 | -4.73985                                               | -3.18519       | -5.11893       | -2.39788       | <b>-0.3153836</b>                               | <b>0.00</b> | <b>-0.2454694</b>        | <b>0.02</b> |
| <i>EZF3</i>   | 2.0676892             | 785  | <b>1.1333364</b> | 595  | -0.25458                                               | -0.48169       | -0.60576       | -0.22030       | <b>-0.2677048</b>                               | <b>0.01</b> | -0.1685326               | 0.11        |
| <i>CDK4</i>   | <b>2.9600333</b>      | 359  | 0.7883319        | 1635 | -1.73786                                               | -0.95476       | -1.77535       | -0.80360       | <b>-0.3554960</b>                               | <b>0.00</b> | <b>-0.2923610</b>        | <b>0.01</b> |
| <i>BTRC</i>   | <b>2.9344809</b>      | 371  | 1.3681312        | 309  | -2.11719                                               | -1.65169       | -1.12690       | -0.99834       | -0.1901542                                      | 0.07        | -0.1282887               | 0.23        |

\*Pearson's product-moment correlation coefficient were calculated for *miR-195* or *miR-497* and each target genes from dataset of HCC primary cases (GSE20596)
