# Supplementary material for: The Tumor-Suppressive miR-497-195 Cluster Targets Multiple Cell-Cycle Regulators in Hepatocellular Carcinoma
Source: PubMed Central journal article supplement (PMC3609788; doi:10.1371/journal.pone.0060155), 2013-03-27
Supplement: pone.0060155.s009.pdf [file pone.0060155.s009.pdf]

Supplementary Table S4 Primers for 3'UTR reporter assays

| Target gene   | Region | Forward primer for 5' to 3'     | Reverse primer for 5' to 3'        | Product size |
|---------------|--------|---------------------------------|------------------------------------|--------------|
| <b>CCND1</b>  | F1     | TTGAGCTCAGGCAGGCGGGCGCCA        | TTGAGCTCTCCCTCCTCTCCGGAGCA         | 3,186 bp     |
|               | F2     | TTACGCGTGAATTCTTGTAATTTTATTAGGA | TTAAGCTTAGATACACAGAAGCGATGTGA      | 224 bp       |
|               | F3     | TTACGCGTTCACATCGCTTCTGTGTATCT   | TTAAGCTTGCTGTTTCACAATACCTCATG      | 222 bp       |
| <b>CDK6</b>   | F1     | TTACGCGTGGCCTCAGCAGCCGCCCT      | TTAAGCTTACCAAATCAGGCCCGGCA         | 390 bp       |
|               | F2     | TTACGCGTTCTAGATTA AACAGGCTTAGT  | TTAAGCTTGATGTGCTACTCATT TTGCT      | 214 bp       |
|               | F3     | TTACGCGTGCCGGTGCCTGAAATTATGT    | TTAGCTTTCGGAGAATTGTGTTGACT         | 165 bp       |
| <b>E2F3</b>   | F1     | TTACGCGTACAAAGTGGGTTAGTACTACA   | TTAAGCTTACATATAAACACACTCCTAACA     | 212 bp       |
| <b>CDK4</b>   | F1     | TTACGCGTGCAATGGAGTGGCTGCCA      | AAGCTTATAAAGGTAGGGAAAGGGACA        | 239 bp       |
| <b>CCNE1</b>  | F1     | TTGAGCTCCCATCCTTCTCCACCAAAGA    | TTACGCGTCAGTATTATCTTTATTA AAAATGGA | 519 bp       |
|               | F2     | TTGAGCTCCCATCCTTCTCCACCAAAGA    | TTACGCGTACACCTGCGAGGAGAGCCA        | 340 bp       |
|               | F3     | TTGAGCTCTGGCTCTCCTCGCAGGTGT     | TTACGCGTCAGTATTATCTTTATTA AAAATGGA | 198 bp       |
| <b>CCND3</b>  | F1     | TTACGCGTCCCTGGAGAGGCCCTCT       | TTAAGCTTCCAAGAAGCCAAGGCCAGT        | 1,006 bp     |
|               | F2     | TTACGCGTCTTCTAAAGGTGTTGTCCCT    | TTAAGCTTCAGGGTTACCACCACTTGT        | 343 bp       |
|               | F3     | TTACGCGTATTAATTGCTTTGAGCACA ACT | TTAAGCTTCCAAGAAGCCAAGGCCAGT        | 368 bp       |
| <b>CDC25A</b> | F1     | TTACGCGTCGGCAGGACCAGCCAGCA      | TTAAGCTTGGGTTCAAGATCTTTTATTTCA     | 1,762 bp     |
|               | F2     | TTACGCGTGTCAAGCTGCTCTGAGCCA     | TTAAGCTTTTGATGAAGTTGAATAAATTAACA   | 196 bp       |
|               | F3     | TTACGCGTACCTGTTATAAGTTATCGGACA  | TTAAGCTTCTCCTATACCAGCCAATGTCA      | 244 bp       |
| <b>BTRC</b>   | F1     | TTGAGCTCCACTCTGTCTACGGACCCT     | TTACGCGTCACACTCCATTATCATGATCCT     | 4,314 bp     |
|               | F2     | TTGAGCTCGACCTCATACTTGCCCAGGA    | TTACGCGTTGGCCAAGTAGAAAACATTTCT     | 1,966 bp     |
|               | F3     | TTGAGCTCAGAAATGTTTTCTACTTGGCCA  | TTACGCGTGAAGCTCTCGGGGAAGCT         | 2,065 bp     |
