# Supplementary material for: The Tumor-Suppressive miR-497-195 Cluster Targets Multiple Cell-Cycle Regulators in Hepatocellular Carcinoma
Source: PubMed Central journal article supplement (PMC3609788; doi:10.1371/journal.pone.0060155), 2013-03-27
Supplement: pone.0060155.s010.pdf [file pone.0060155.s010.pdf]

**Supplementary Table S5 Primers for Genomic real-time PCR, Promoter assay, Bisulfite sequencing, and CHIP-PCR**

| <b>Assay name</b>           | <b>Region</b>  | <b>Forward primer for 5' to 3'</b> | <b>Reverse primer for 5' to 3'</b> | <b>Product size</b> |
|-----------------------------|----------------|------------------------------------|------------------------------------|---------------------|
| <b>Genomic realtime PCR</b> | <b>miR-497</b> | TCCTGGTTCCCTCCAAA                  | TGAAAGGAAGAGAGCACATAGCA            | <b>121 bp</b>       |
|                             | <b>miR-195</b> | TGTAAGCACCCCTCTAAAATCTCC           | TGGGCAACAAAGACTCCACTT              | <b>108 bp</b>       |
| <b>Promoter assay</b>       | <b>F1</b>      | TTACGCGTAGCTAAGGGATAATCATAAGGT     | TTAAGCTTCTCCCCTGAGATCCTGGT         | <b>1,332 bp</b>     |
|                             | <b>F2</b>      | TTACGCGTACTGGGAGTGTGGGTGAGA        | TTAAGCTTCTCCCCTGAGATCCTGGT         | <b>899 bp</b>       |
|                             | <b>F3</b>      | TTACGCGTACCAGGATCTCAGGGGAGA        | TTAAGCTTGAAAGGAAGAGAGCACATAG       | <b>1,381 bp</b>     |
|                             | <b>F4</b>      | TTACGCGTCTATGTGCTCTCTCTTTCA        | TTAAGCTTACCACCCTGCCTGGAGCA         | <b>430 bp</b>       |
| <b>Bisulfite sequence</b>   | <b>1</b>       | GTTTAGGATTTGAAGGGAGAAA             | TTTAAAAATCACTCCCTCCTTC             | <b>719 bp</b>       |
|                             | <b>2</b>       | GAAGGAGGGAGTGATTTTTAAA             | TCTCCCCTAAAATCCTAATCC              | <b>503 bp</b>       |
|                             | <b>3</b>       | TTTAGGGGAGAGTAGTTGAGGT             | CTCAAAAAACAAAATCCAAAAA             | <b>583 bp</b>       |
|                             | <b>4</b>       | GTTTTGGTTTTTTGGATTTTGT             | AAAAACCAACACACTACCTCCT             | <b>554 bp</b>       |
|                             | <b>5</b>       | TAGGAGGTAGTGTGGTTTTT               | AAATACTTACATACCCACCCCT             | <b>509 bp</b>       |
| <b>CHIP-PCR</b>             | <b>R1</b>      | CAACAGCAATGGCAGATTCC               | AAAGCCCGTTCCTCCCTTC                | <b>360 bp</b>       |
|                             | <b>R2</b>      | AAATTGGCATCGGGACAGAG               | TCCTGGACTAGCTCCCCAAA               | <b>343 bp</b>       |
